# Supplementary material
Source: Springer Nature journal article supplement (https://www.springermedizin.de/resource/supplementary/13256_2010_1497_MOESM10_ESM.pdf/9647772)

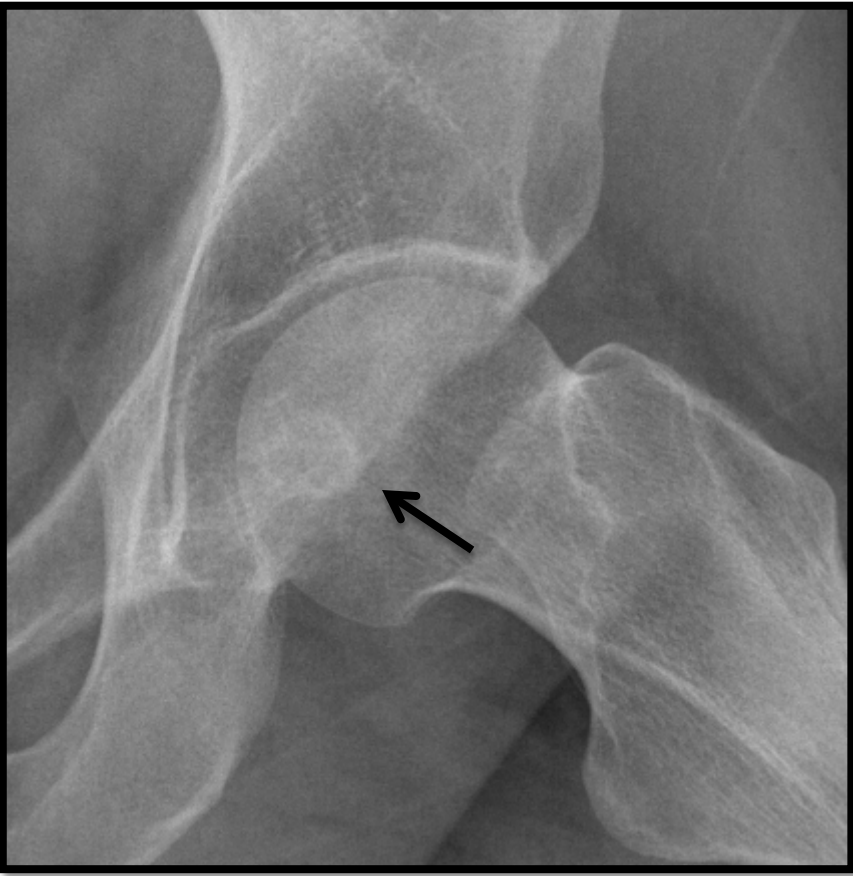

Supplement: MOESM10 [file 9647772]
